# Supplementary material for: A theoretical study of imine-ene reaction influencing factors
Source: Royal Society of Chemistry journal article supplement (doi:10.1039/c1ob05493g), 2011-01-01
Supplement: c1ob05493g.pdf [file c1ob05493g.pdf]

# A Theoretical Studies of Imine-ene Reactions: Mechanism and Influencing Factors

**Qi-wu Yang, Yan Liu and Wen-qin Zhang\***

*Department of Chemistry, Tianjin University, Tianjin 300072, P. R. China*

Tel: +86 22 27407999

E-mail: [zhangwenqin@tju.edu.cn](mailto:zhangwenqin@tju.edu.cn)

**Supporting Material**

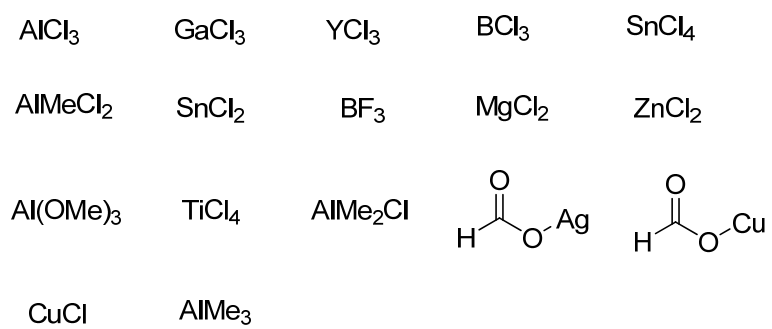

Chart S1: The selected Lewis acids

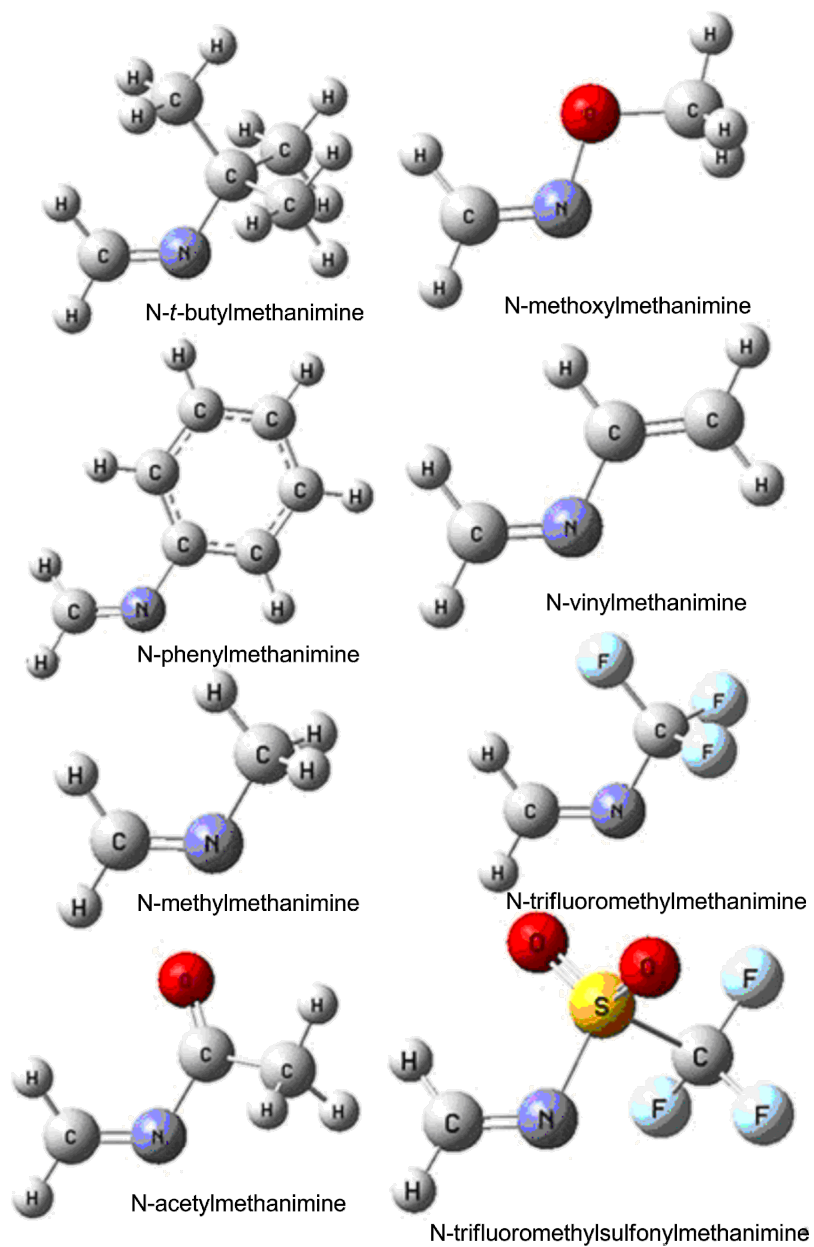

Chart S2: The selected Schiff base structures (substituent on nitrogen).

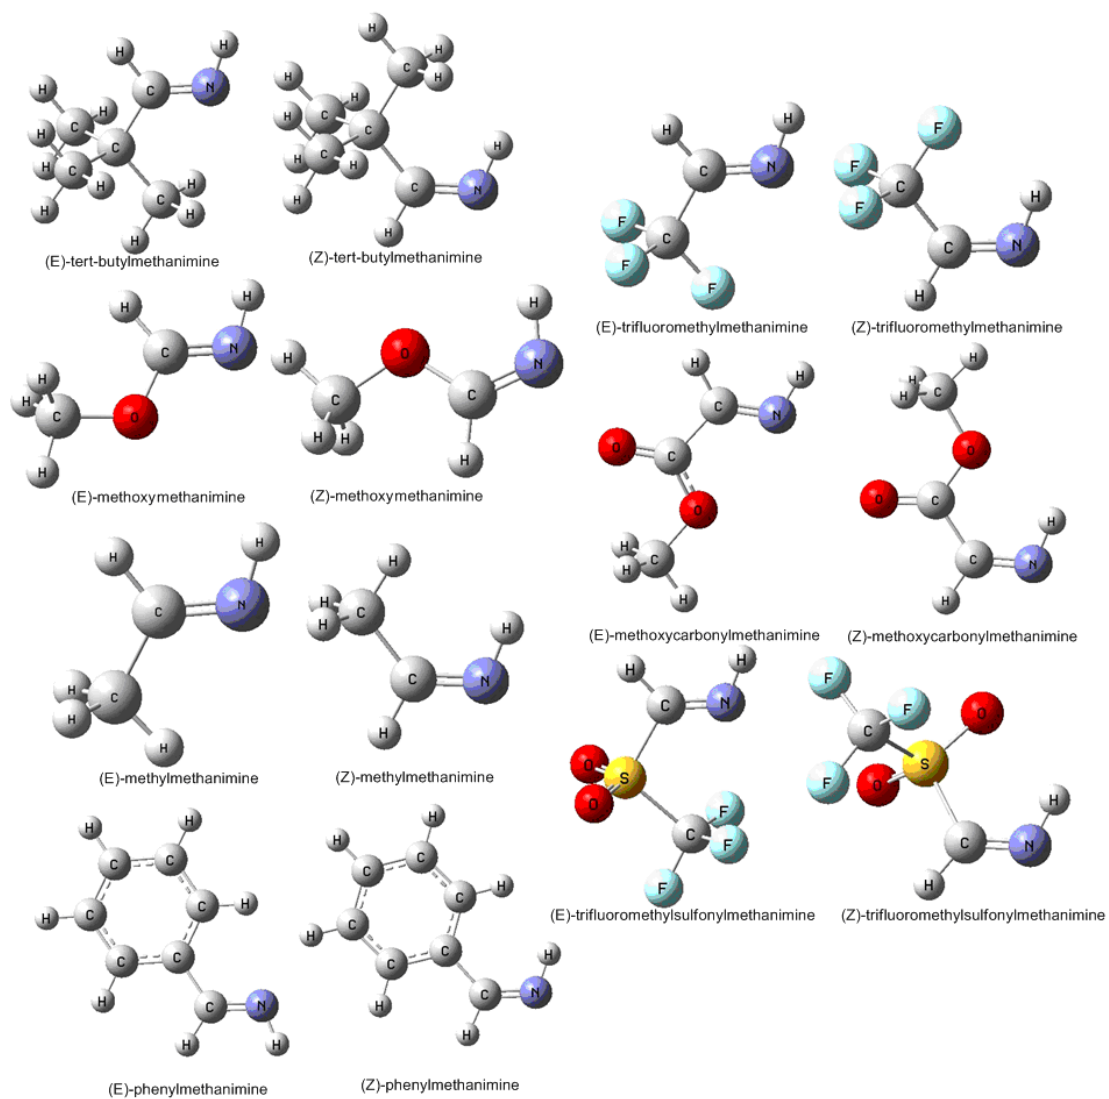

Chart S3: The selected Schiff base structures (substituent on carbon)

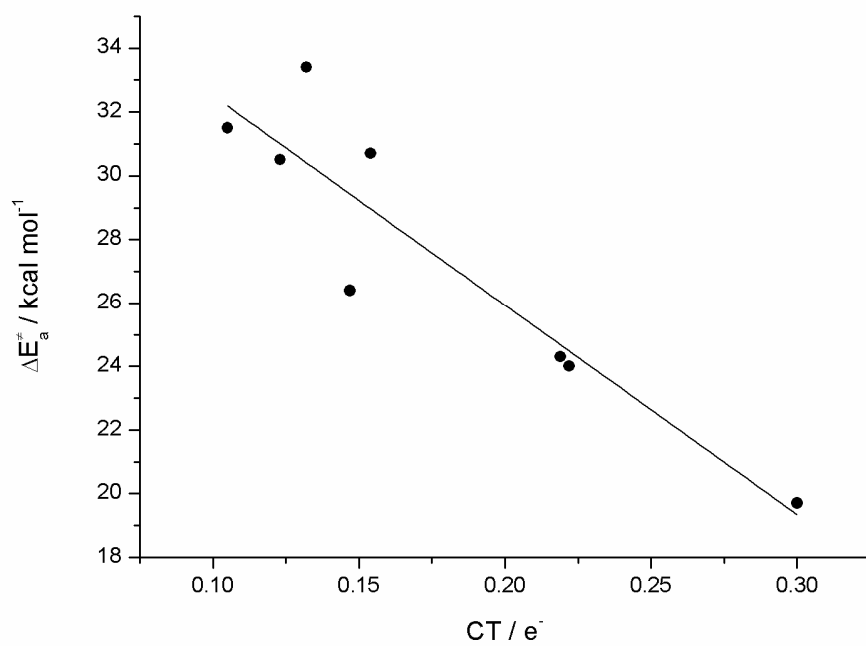

(a)

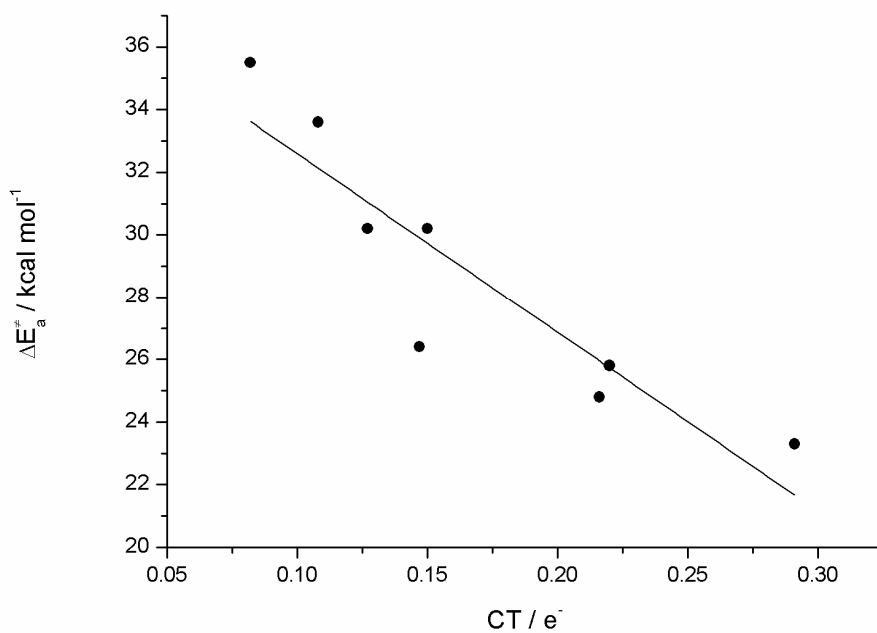

(b)

Chart S4: Plot of the activation barriers ( $\Delta E_a^\ddagger$ ) vs. the charge transfer (CT) of the reactions between propene and the C-substituted imines.  $R^2=0.83$  for (a) and  $R^2=0.80$  for (b)

Table S1: The comparison of the basis sets

|                   | 6-31G*                                              |                                                     |                                                              |                                                              | LanL2DZ                                             |                                                     |                                                              |                                                              |
|-------------------|-----------------------------------------------------|-----------------------------------------------------|--------------------------------------------------------------|--------------------------------------------------------------|-----------------------------------------------------|-----------------------------------------------------|--------------------------------------------------------------|--------------------------------------------------------------|
|                   | $\Delta E_{\text{rxn}} /$<br>kcal mol <sup>-1</sup> | $\Delta G_{\text{rxn}} /$<br>kcal mol <sup>-1</sup> | $\Delta E_{\text{a}}^{\ddagger} /$<br>kcal mol <sup>-1</sup> | $\Delta G_{\text{a}}^{\ddagger} /$<br>kcal mol <sup>-1</sup> | $\Delta E_{\text{rxn}} /$<br>kcal mol <sup>-1</sup> | $\Delta G_{\text{rxn}} /$<br>kcal mol <sup>-1</sup> | $\Delta E_{\text{a}}^{\ddagger} /$<br>kcal mol <sup>-1</sup> | $\Delta G_{\text{a}}^{\ddagger} /$<br>kcal mol <sup>-1</sup> |
| AlCl <sub>3</sub> | -23.2                                               | -7.4                                                | 17.1                                                         | 30.3                                                         | -23.7                                               | -7.8                                                | 16.5                                                         | 30.0                                                         |
| BCl <sub>3</sub>  | -23.8                                               | -7.7                                                | 17.4                                                         | 31.2                                                         | -23.9                                               | -7.7                                                | 17.6                                                         | 31.5                                                         |
| AlMe <sub>3</sub> | -21.1                                               | -5.4                                                | 24.3                                                         | 37.5                                                         | -22.7                                               | -7.0                                                | 22.6                                                         | 35.4                                                         |

Table S2: The comparison of the solvent effect

|           |            | vacuum                                                    | cyclohexane                                               | dichloromethane                                           | water                                                     |
|-----------|------------|-----------------------------------------------------------|-----------------------------------------------------------|-----------------------------------------------------------|-----------------------------------------------------------|
|           |            | $\Delta G_{\text{a}}^{\ddagger} /$ kcal mol <sup>-1</sup> |
| Concerted | TS-barrier | 38.2                                                      | 37.9                                                      | 38.3                                                      | 37.8                                                      |
|           | product    | -3.4                                                      | -3.4                                                      | -3.1                                                      | -3.5                                                      |
| Stepwise  | TS1        | 77.1                                                      | 77.2                                                      | 77.2                                                      | 76.8                                                      |
|           | INT1       | 50.7                                                      | 51.1                                                      | 51.5                                                      | 49.0                                                      |
|           | INT2       | 51.1                                                      | 51.5                                                      | 52.2                                                      | 51.9                                                      |
|           | TS2        | 67.9                                                      | 67.6                                                      | 68.3                                                      | 67.8                                                      |
|           | product    | 57.8                                                      | 56.9                                                      | 58.4                                                      | 58.0                                                      |

The evolution of the IRC as a function of the reaction coordinates has also been performed, and the results are given in Figure S1. The reaction can be described by the relative and interdependent distances of N4-H5 and C6-H5. The two distances decreases and increases respectively as a function of  $s$ . Bond formation and breaking occur in the range from  $-0.5$  to  $+0.5$   $\text{amu}^{1/2}$  bohr. The path from the reactant ( $s < 0$ ) to the TS ( $s = 0$ ) is characterized by the changes in the distances between N4-H5 and C6-H5. The distance change of C1-C11 is independent of the distance of N4-H5 or C6-H5, and it begins at  $-0.5$   $\text{amu}^{1/2}$  bohr and is nearly linear with  $s$  during the whole process. It is noteworthy that the breaking and forming of the C9-C11, C1-N4 and C6-C9  $\pi$  bonds start at  $s = -0.5$   $\text{amu}^{1/2}$  bohr simultaneously, and so do the breaking and forming of the C6-H5 and N4-H5  $\sigma$  bonds. The path after the TS ( $s > 0$ ) follows the completion of the H migration as the bond length of C6-H5 increases and N4-H5 decreases. The C1 and C11 get closer, followed by the  $\sigma$ -bond formation and finally the amine product is generated.

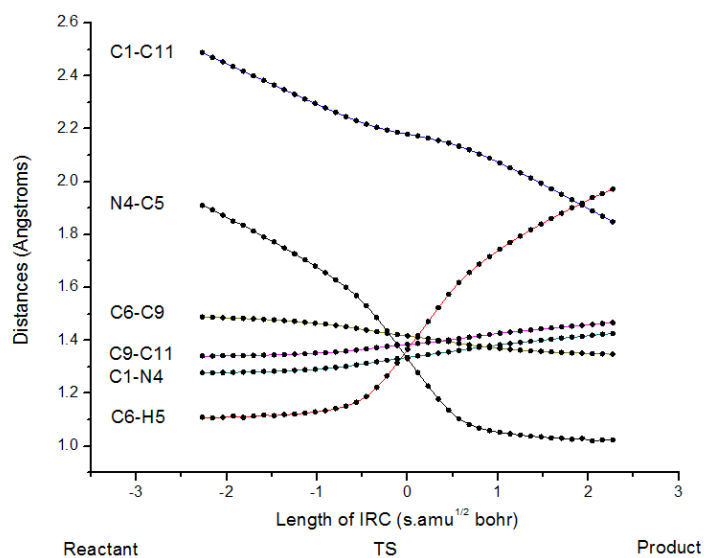

Figure S1 The evolution of the IRC for the concerted mechanism (without a Lewis acid)

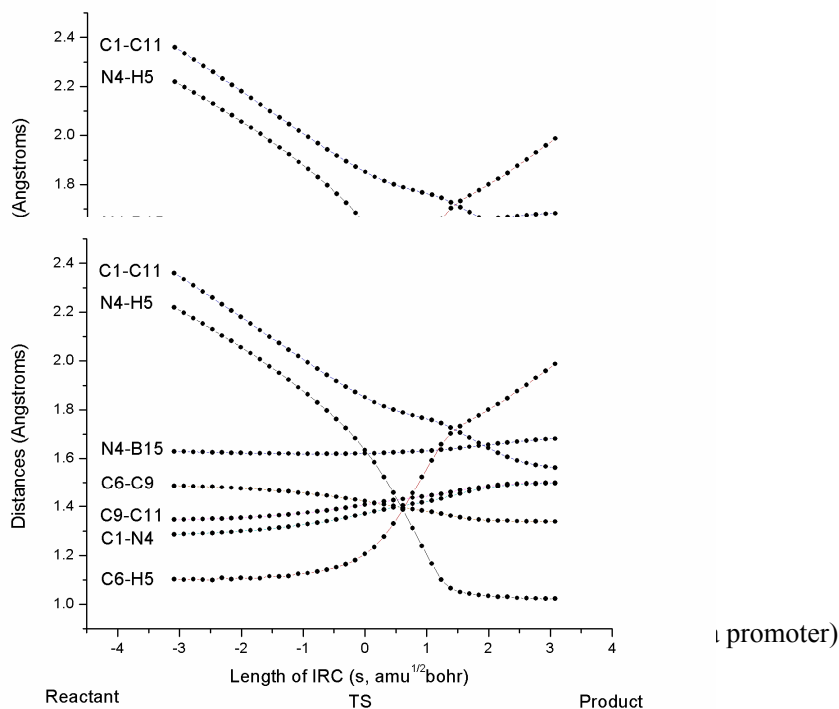

Figure S2

(promoter)

**Concerted:**

**Lewis acid present:**

**Propene**

E(RB+HF-LYP) = -117.9140126 a.u.

Sum of electronic and thermal Free Energies = -117.859187 a.u.

|   |             |             |             |
|---|-------------|-------------|-------------|
| C | -1.23465200 | 0.16290700  | -0.00000700 |
| H | -1.81134400 | -0.15060800 | 0.87955000  |
| H | -1.18143200 | 1.25582100  | -0.00022800 |
| H | -1.81150300 | -0.15093300 | -0.87936800 |
| C | 0.13379000  | -0.45551700 | 0.00001500  |
| H | 0.16478300  | -1.54580000 | -0.00001300 |
| C | 1.28280100  | 0.22064500  | 0.00003000  |
| H | 2.24397700  | -0.28497600 | -0.00015300 |
| H | 1.30388400  | 1.30828300  | -0.00002000 |

**Imine-AlCl<sub>3</sub>**

E(RB+HF-LYP) = -141.744565072 a.u.

Sum of electronic and thermal Free Energies = -141.731585 a.u.

|    |             |             |             |
|----|-------------|-------------|-------------|
| C  | -2.16547900 | -0.00076500 | 1.65506600  |
| H  | -2.74931500 | -0.00097600 | 0.73594000  |
| H  | -2.67619200 | -0.00093000 | 2.61764100  |
| N  | -0.89261500 | -0.00031400 | 1.56560700  |
| H  | -0.39213700 | -0.00009700 | 2.45555900  |
| Al | 0.21107700  | -0.00001800 | -0.13728600 |
| Cl | 1.33495600  | -1.83218400 | 0.08582700  |
| Cl | -1.35618100 | -0.00011000 | -1.63752200 |
| Cl | 1.33386100  | 1.83282500  | 0.08616100  |

**TS-H-AlCl<sub>3</sub>**

E(RB+HF-LYP) = -259.632329752 a.u.

Sum of electronic and thermal Free Energies = -259.543021 a.u.

|    |             |             |             |
|----|-------------|-------------|-------------|
| C  | 1.42944600  | -1.40406100 | -0.79078100 |
| H  | 1.20829100  | -1.91218100 | 0.14537300  |
| H  | 1.60429200  | -2.10162200 | -1.61103300 |
| N  | 0.54704600  | -0.37294600 | -1.07138200 |
| H  | 1.44976900  | 0.96407500  | -0.48715600 |
| C  | 2.49574100  | 1.41597600  | -0.13333400 |
| H  | 2.32794300  | 2.19830300  | 0.60318200  |
| H  | 2.89125200  | 1.78805900  | -1.08183500 |
| C  | 3.02919000  | 0.17929800  | 0.32758600  |
| H  | 3.01255200  | -0.03453300 | 1.39486200  |
| C  | 3.14019900  | -0.90070400 | -0.57703100 |
| H  | 3.62224700  | -1.80735500 | -0.21625600 |
| H  | 3.43567700  | -0.63708700 | -1.59287000 |
| H  | 0.48444000  | -0.15665400 | -2.06356000 |
| Al | -1.00961800 | 0.03181900  | 0.02955900  |
| Cl | -2.59949400 | -1.37185200 | -0.43725700 |

Cl -0.14337500 -0.25281400 2.03339900

Cl -1.45173100 2.10424900 -0.47460800

**Pro-AlCl<sub>3</sub>**

E(RB+HF-LYP) = -259.696344734 a.u.

Sum of electronic and thermal Free Energies = -259.603187 a.u.

|    |             |             |             |
|----|-------------|-------------|-------------|
| C  | 1.48630200  | -1.17961000 | -0.05740700 |
| H  | 1.32286000  | -1.27595800 | 1.01929300  |
| H  | 1.03991700  | -2.04962100 | -0.54370500 |
| N  | 0.70834100  | 0.02163600  | -0.50338400 |
| H  | 1.19073000  | 0.86041500  | -0.16399400 |
| C  | 4.06048500  | 1.22380000  | -0.29019200 |
| H  | 4.48995000  | 2.05042100  | 0.26741000  |
| H  | 4.03672400  | 1.32762700  | -1.37300700 |
| C  | 3.61283900  | 0.12385000  | 0.31966000  |
| H  | 3.66622200  | 0.05844200  | 1.40698600  |
| C  | 2.98297700  | -1.05202500 | -0.38029400 |
| H  | 3.46755500  | -1.98567600 | -0.06749300 |
| H  | 3.12303700  | -0.96934300 | -1.46566700 |
| H  | 0.74961800  | 0.08993900  | -1.52317300 |
| Al | -1.24686100 | 0.09370400  | 0.04552700  |
| Cl | -2.04461100 | -1.66550600 | -0.93887500 |
| Cl | -1.12651400 | 0.00440400  | 2.20753100  |
| Cl | -1.81072300 | 2.00392800  | -0.80838600 |

**Imine-BF<sub>3</sub>**

E(RB+HF-LYP) = -419.213406522 a.u.

Sum of electronic and thermal Free Energies = -419.186812 a.u.

|   |             |             |             |
|---|-------------|-------------|-------------|
| C | 2.07375600  | 0.04085300  | -0.00006000 |
| H | 1.99364500  | 1.12492200  | 0.00054300  |
| H | 3.05241000  | -0.43639600 | -0.00052500 |
| N | 0.99170200  | -0.62431800 | -0.00042500 |
| H | 1.06567100  | -1.64096000 | -0.00111200 |
| B | -0.54558800 | 0.04802900  | 0.00001000  |
| F | -1.11263900 | -0.43346200 | -1.15041600 |
| F | -1.11095900 | -0.43215300 | 1.15188200  |
| F | -0.30620700 | 1.40310400  | -0.00097900 |

**TS-H-BF<sub>3</sub>**

E(RB+HF-LYP) = -537.094380727 a.u.

Sum of electronic and thermal Free Energies = -536.991836 a.u.

|   |             |             |             |
|---|-------------|-------------|-------------|
| C | 0.67117100  | -1.42663600 | -0.25127800 |
| H | 0.38908500  | -1.70268300 | 0.76013000  |
| H | 0.95546700  | -2.27163500 | -0.87710400 |
| N | -0.18178200 | -0.51456300 | -0.81601400 |
| H | 0.63059900  | 0.89150800  | -0.63984100 |
| C | 1.62837500  | 1.49748800  | -0.33555200 |
| H | 1.34679500  | 2.45629000  | 0.09354200  |



|   |             |             |             |
|---|-------------|-------------|-------------|
| H | 2.12953000  | 1.58294200  | -1.30280000 |
| C | 2.12870100  | 0.49949200  | 0.54494700  |
| H | 1.95895100  | 0.61300700  | 1.61368800  |
| C | 2.38407900  | -0.78675200 | 0.03604200  |
| H | 2.80637000  | -1.53074100 | 0.70796000  |
| H | 2.79805100  | -0.83127900 | -0.97094800 |
| H | -0.30550200 | -0.59355700 | -1.82048400 |
| B | -1.40926700 | 0.07260900  | 0.06513500  |
| F | -1.77055900 | 1.26509200  | -0.53310900 |
| F | -0.83469600 | 0.25129500  | 1.32996300  |
| F | -2.42413300 | -0.85822100 | 0.07618100  |

### Pro-BF<sub>3</sub>

E(RB+HF-LYP) = -537.165689841 a.u.

Sum of electronic and thermal Free Energies = -537.058944 a.u.

|   |             |             |             |
|---|-------------|-------------|-------------|
| C | 0.54937800  | -1.09164500 | 0.05456600  |
| H | 0.35452500  | -1.15352000 | 1.12795400  |
| H | 0.06568800  | -1.94758300 | -0.41983000 |
| N | -0.16757900 | 0.12257700  | -0.41941400 |
| H | 0.30538300  | 0.95745800  | -0.06669000 |
| C | 3.27840600  | 1.15395700  | -0.16101700 |
| H | 3.74676100  | 1.96047000  | 0.39490000  |
| H | 3.28865700  | 1.24058500  | -1.24553700 |
| C | 2.74172100  | 0.09745400  | 0.45297500  |
| H | 2.76133200  | 0.04916100  | 1.54252200  |
| C | 2.05563900  | -1.04919400 | -0.24250700 |
| H | 2.48534200  | -2.00301700 | 0.08985100  |
| H | 2.22110200  | -0.98855600 | -1.32592000 |
| H | -0.13231000 | 0.18234900  | -1.43775400 |
| B | -1.78040200 | 0.18306900  | 0.03771700  |
| F | -2.22598000 | 1.36689500  | -0.49866800 |
| F | -1.74672600 | 0.15935800  | 1.41332400  |
| F | -2.33532500 | -0.94116000 | -0.52979800 |

### Lewis acid absent:

#### Imine

E(RB+HF-LYP) = -94.6309726057 a.u.

Sum of electronic and thermal Free Energies = -94.612903 a.u.

|   |             |             |             |
|---|-------------|-------------|-------------|
| C | -0.58645700 | 0.02863400  | -0.00014400 |
| H | -1.24468800 | -0.84498800 | 0.00010200  |
| H | -1.09191000 | 1.00409800  | 0.00020400  |
| N | 0.67038200  | -0.15384200 | 0.00004400  |
| H | 1.16266700  | 0.74598000  | 0.00025000  |

#### TS-endo

E(RB+HF-LYP) = -212.499071487 a.u.

Sum of electronic and thermal Free Energies = -212.407580 a.u.

|   |             |            |            |
|---|-------------|------------|------------|
| C | -1.48895500 | 0.40865300 | 0.04544800 |
|---|-------------|------------|------------|

|   |             |             |             |
|---|-------------|-------------|-------------|
| H | -1.81293700 | 0.99635600  | -0.81152200 |
| H | -1.72634900 | 0.82865600  | 1.01944200  |
| N | -1.36805700 | -0.92231500 | -0.03052500 |
| H | -0.12640100 | -1.22120800 | 0.18115700  |
| C | 1.24719900  | -1.00810300 | 0.24077700  |
| H | 1.78847500  | -1.82042200 | -0.24063100 |
| H | 1.29417600  | -1.03687900 | 1.33154900  |
| C | 1.23305300  | 0.25937400  | -0.38118700 |
| H | 1.48810300  | 0.30143600  | -1.44160200 |
| C | 0.53697200  | 1.32921800  | 0.15333500  |
| H | 0.46028200  | 2.26319900  | -0.39581000 |
| H | 0.45212200  | 1.42107600  | 1.23239200  |
| H | -1.41068300 | -1.21086500 | -1.01154300 |

#### TS-exo

E(RB+HF-LYP) = -212.502979988 a.u.

Sum of electronic and thermal Free Energies = -212.411230 a.u.

|   |             |             |             |
|---|-------------|-------------|-------------|
| C | -1.44227900 | 0.39850700  | -0.20931200 |
| H | -1.44267800 | 0.77643400  | -1.22935600 |
| H | -1.95788400 | 1.02502800  | 0.51711300  |
| N | -1.35930500 | -0.92451000 | -0.04908200 |
| H | -0.06843300 | -1.23493900 | -0.14073200 |
| C | 1.25733800  | -1.01979400 | 0.10716700  |
| H | 1.85383800  | -1.72754700 | -0.46618900 |
| H | 1.27782100  | -1.21247300 | 1.18139700  |
| C | 1.24096700  | 0.33328300  | -0.31130700 |
| H | 1.56044700  | 0.55193700  | -1.33109500 |
| C | 0.47217700  | 1.28512200  | 0.33661400  |
| H | 0.41337500  | 2.29960300  | -0.04808100 |
| H | 0.29092700  | 1.18688900  | 1.40451300  |
| H | -1.58149500 | -1.17607500 | 0.91703600  |

#### Pro

E(RB+HF-LYP) = -212.574643701 a.u.

Sum of electronic and thermal Free Energies = -212.477463 a.u.

|   |             |             |             |
|---|-------------|-------------|-------------|
| C | 1.35214300  | -0.43172400 | -0.17231600 |
| H | 1.42305000  | -0.70574800 | -1.23308900 |
| H | 2.15705600  | -0.97273800 | 0.33891700  |
| N | 1.62187800  | 1.00000800  | -0.05585500 |
| H | 0.85030700  | 1.52221200  | -0.46704600 |
| C | -2.03205400 | 0.57015900  | 0.11717800  |
| H | -2.84280400 | 0.97058900  | -0.48471600 |
| H | -1.96143200 | 0.93181800  | 1.14077400  |
| C | -1.17687700 | -0.33440700 | -0.36413500 |
| H | -1.29059900 | -0.66807400 | -1.39732100 |
| C | -0.01097100 | -0.91651500 | 0.38489700  |
| H | -0.04291200 | -2.01401500 | 0.32376100  |

|   |             |             |            |
|---|-------------|-------------|------------|
| H | -0.07987400 | -0.65301900 | 1.44858000 |
| H | 1.64061900  | 1.26383900  | 0.92738800 |

**Stepwise:**

**Lewis acid present:**

**TS-1-BF<sub>3</sub>**

E(UB+HF-LYP) = -537.029040142 a.u.

Sum of electronic and thermal Free Energies = -536.932828 a.u.

|   |             |             |             |
|---|-------------|-------------|-------------|
| C | 0.23159500  | 1.16720100  | -1.11756800 |
| H | 0.66454100  | 0.23845400  | -1.46706100 |
| H | 0.62021800  | 2.11167600  | -1.48808300 |
| N | -0.92997300 | 1.09534100  | -0.54283100 |
| H | 2.77464100  | -0.80253000 | -1.50103000 |
| C | 2.62497200  | -1.14221700 | -0.46392300 |
| H | 3.37768300  | -1.90854500 | -0.26479200 |
| H | 1.63179700  | -1.61092000 | -0.42335300 |
| C | 2.73256800  | -0.01504000 | 0.51751100  |
| H | 3.46661200  | -0.10041300 | 1.32178700  |
| C | 1.74536200  | 1.05128000  | 0.67929800  |
| H | 2.05381100  | 2.09171900  | 0.55376200  |
| H | 0.91790200  | 0.90012800  | 1.37674900  |
| H | -1.38677100 | 1.97256200  | -0.30646600 |
| B | -1.51870200 | -0.27360300 | 0.12206000  |
| F | -1.24673300 | -0.12197900 | 1.47590000  |
| F | -2.85798300 | -0.30610200 | -0.16407100 |
| F | -0.78685000 | -1.30068000 | -0.45670800 |

**INT-1-BF<sub>3</sub>**

E(UB+HF-LYP) = -537.062469645 a.u.

Sum of electronic and thermal Free Energies = -536.966123 a.u.

|   |             |             |             |
|---|-------------|-------------|-------------|
| C | -0.60884500 | -0.74086800 | -0.79120300 |
| H | -0.65854100 | 0.25058200  | -1.24503100 |
| H | -0.94161300 | -1.50190300 | -1.50680900 |
| N | 0.75800000  | -0.96274200 | -0.41329100 |
| H | -4.22599800 | 1.12399800  | -0.67336100 |
| C | -3.31625300 | 1.03488500  | -0.07000700 |
| H | -3.51835000 | 1.55205100  | 0.88388000  |
| H | -2.52193100 | 1.60551200  | -0.56546500 |
| C | -2.93859100 | -0.39138800 | 0.14916000  |
| H | -3.72561300 | -1.12483600 | 0.30097600  |
| C | -1.52643400 | -0.78974800 | 0.47601200  |
| H | -1.49363400 | -1.80169900 | 0.89360900  |
| H | -1.07881400 | -0.11621000 | 1.21959700  |
| H | 1.02044800  | -1.93542000 | -0.24333700 |
| B | 1.77757500  | 0.22943800  | 0.06127000  |
| F | 1.43509400  | 0.37376700  | 1.39782700  |
| F | 3.03856100  | -0.26388800 | -0.14096000 |

**INT-1'-BF<sub>3</sub>**

E(UB3LYP) = -537.062635593 a.u.

Sum of electronic and thermal Free Energies = -536.962762 a.u.

|   |             |             |             |
|---|-------------|-------------|-------------|
| C | 0.66084000  | -1.02558600 | 0.22828200  |
| H | 0.57599000  | -0.78537900 | 1.29009900  |
| H | 0.14795700  | -1.97497800 | 0.06036600  |
| N | -0.13341900 | 0.00620000  | -0.49240500 |
| H | 2.24269700  | 2.06582000  | 0.86325400  |
| C | 2.56492600  | 1.47714300  | 0.00350700  |
| H | 2.76056500  | 2.04182600  | -0.91049100 |
| H | 0.31745000  | 0.91947300  | -0.38537100 |
| C | 2.97935900  | 0.08670100  | 0.14284700  |
| H | 4.02902100  | -0.11627600 | 0.36531600  |
| C | 2.12682000  | -1.10359100 | -0.21677100 |
| H | 2.56699400  | -2.00451900 | 0.22627100  |
| H | 2.15096300  | -1.27711600 | -1.30959600 |
| H | -0.14946200 | -0.19360700 | -1.49334800 |
| B | -1.72196900 | 0.12613600  | 0.03090800  |
| F | -2.25479300 | 1.10868900  | -0.76865700 |
| F | -2.24619100 | -1.12811400 | -0.18688900 |
| F | -1.62013500 | 0.46861200  | 1.35983500  |

**TS-2-BF<sub>3</sub>**

E(UB3LYP) = -537.041835482 a.u.

Sum of electronic and thermal Free Energies = -536.945629 a.u.

|   |             |             |             |
|---|-------------|-------------|-------------|
| C | 0.78226400  | -1.23291200 | 0.11861700  |
| H | 0.55160400  | -1.14584200 | 1.18249400  |
| H | 0.47744800  | -2.22994000 | -0.21943500 |
| N | -0.05059300 | -0.23537900 | -0.56352900 |
| H | 1.37095300  | 2.07439600  | 0.84664900  |
| C | 1.70861400  | 1.52775900  | -0.04174800 |
| H | 1.90264800  | 2.21058700  | -0.87828600 |
| H | 0.63868100  | 0.87149500  | -0.36843400 |
| C | 2.66863500  | 0.42583000  | 0.16776700  |
| H | 3.71131900  | 0.65337100  | 0.38257100  |
| C | 2.28152700  | -0.99329100 | -0.13855800 |
| H | 2.86839300  | -1.69864200 | 0.46099600  |
| H | 2.51149600  | -1.23817900 | -1.19278000 |
| H | -0.02992000 | -0.33820500 | -1.58032900 |
| B | -1.55857800 | 0.07800600  | 0.03842800  |
| F | -2.02901900 | 1.11518100  | -0.73097900 |
| F | -2.24178300 | -1.10728400 | -0.13136000 |
| F | -1.34051300 | 0.40702100  | 1.36041200  |

**Lewis acid absent:**

### TS-1

E(UB3LYP) = -212.434380615 a.u.

Sum of electronic and thermal Free Energies = -212.349222 a.u.

|   |             |             |             |
|---|-------------|-------------|-------------|
| C | -1.33189600 | -0.62197900 | -0.07306700 |
| H | -0.81614500 | -1.12145700 | 0.74860700  |
| H | -0.96813300 | -0.87722100 | -1.07555900 |
| N | -2.49305300 | -0.09107400 | 0.17658400  |
| H | 1.40702900  | -1.45615400 | -0.66989600 |
| C | 1.97506800  | -0.81677900 | 0.01754300  |
| H | 3.03645900  | -0.92082500 | -0.22543000 |
| H | 1.83187400  | -1.24319600 | 1.02504400  |
| C | 1.54200500  | 0.61437900  | -0.05421700 |
| H | 2.31985100  | 1.37801700  | 0.02117300  |
| C | 0.15412900  | 1.08348600  | 0.02453400  |
| H | -0.25532300 | 1.62830200  | -0.82849300 |
| H | -0.21804500 | 1.46592500  | 0.97797800  |
| H | -2.92203000 | 0.22948400  | -0.69826800 |

### INT-1

E(UB+HF-LYP) = -212.478846582 a.u.

Sum of electronic and thermal Free Energies = -212.391235 a.u.

|   |             |             |             |
|---|-------------|-------------|-------------|
| C | 1.14816700  | -0.29053000 | 0.34264500  |
| H | 0.82109300  | -1.34336900 | 0.25753200  |
| H | 1.20763100  | -0.10306300 | 1.43102100  |
| N | 2.44664800  | -0.11811400 | -0.26434400 |
| H | -2.09632500 | -1.49104400 | 0.28700900  |
| C | -2.25918900 | -0.49575700 | -0.16436300 |
| H | -3.28623500 | -0.20921400 | 0.08859200  |
| H | -2.20314000 | -0.63747900 | -1.25098000 |
| C | -1.26895200 | 0.51802000  | 0.30654600  |
| H | -1.46678000 | 1.03153000  | 1.24572700  |
| C | 0.09428900  | 0.64543800  | -0.29389800 |
| H | 0.46891200  | 1.67214500  | -0.19295200 |
| H | 0.06320900  | 0.42529400  | -1.36909800 |
| H | 3.07921400  | -0.78102700 | 0.20797700  |

### INT-1'

E(UB+HF-LYP) = -212.469998671 a.u.

Sum of electronic and thermal Free Energies = -212.379968 a.u.

|   |             |             |             |
|---|-------------|-------------|-------------|
| C | 1.19495100  | 0.38130800  | 0.38392700  |
| H | 1.00420700  | 0.26540700  | 1.46611500  |
| H | 2.07138400  | 1.03403000  | 0.28800300  |
| N | 1.49956500  | -0.87263400 | -0.31316500 |
| H | 0.70417300  | -1.50390800 | -0.22520200 |
| C | -1.64078800 | -0.93630900 | 0.08472000  |
| H | -1.71672900 | -1.48110300 | 1.02616800  |
| H | -1.92579400 | -1.49157600 | -0.81105100 |

|   |             |             |             |
|---|-------------|-------------|-------------|
| C | -1.35726700 | 0.49153700  | 0.04296800  |
| H | -2.20620900 | 1.18021800  | 0.04331700  |
| C | -0.00758300 | 1.09464900  | -0.25488500 |
| H | -0.01715100 | 2.14310400  | 0.06875000  |
| H | 0.16939100  | 1.11104100  | -1.34488600 |
| H | 2.28389400  | -1.33588700 | 0.14056100  |

### TS-2

E(UB+HF-LYP) = -212.451612471 a.u.

Sum of electronic and thermal Free Energies = -212.363812 a.u.

|   |             |             |             |
|---|-------------|-------------|-------------|
| C | 1.25945800  | 0.27229800  | 0.29195200  |
| H | 1.25191900  | 0.26331100  | 1.39338400  |
| H | 2.23174100  | 0.68518800  | -0.01707100 |
| N | 1.11040700  | -1.05792200 | -0.31031800 |
| H | -0.12904500 | -1.23102800 | -0.24841000 |
| C | -1.39829600 | -0.85944800 | 0.05315700  |
| H | -1.67484400 | -1.35080800 | 0.99385300  |
| H | -1.99819000 | -1.25359800 | -0.77734000 |
| C | -1.21660500 | 0.60688200  | 0.09927800  |
| H | -2.07953500 | 1.27019800  | 0.15561600  |
| C | 0.13284000  | 1.19176400  | -0.21117400 |
| H | 0.24130300  | 2.19306200  | 0.22252800  |
| H | 0.25343000  | 1.31376000  | -1.30284400 |
| H | 1.46599200  | -1.75360500 | 0.35322800  |

### Functional groups on N

#### Imine-CF<sub>3</sub>

E(RB+HF-LYP) = -431.665583044 a.u.

Sum of electronic and thermal Free Energies = -431.648666 a.u.

|   |             |             |             |
|---|-------------|-------------|-------------|
| C | 1.97371200  | -0.01888300 | -0.00010000 |
| H | 2.93020400  | -0.54132800 | 0.00023600  |
| H | 1.98926900  | 1.07475000  | 0.00022400  |
| N | 0.91164600  | -0.71427200 | -0.00011300 |
| C | -0.34107100 | -0.03526300 | -0.00000200 |
| F | -0.26929900 | 1.32048700  | -0.00017100 |
| F | -1.03754500 | -0.39417500 | -1.08941300 |
| F | -1.03724800 | -0.39393900 | 1.08968800  |

#### TS-CF<sub>3</sub>

E(RB+HF-LYP) = -549.541939434 a.u.

Sum of electronic and thermal Free Energies = -549.449823 a.u.

|   |             |             |             |
|---|-------------|-------------|-------------|
| C | -0.53119800 | -1.28604000 | -0.61095500 |
| H | -1.07919700 | -1.70774600 | -1.45148300 |
| H | -0.10396700 | -2.03899400 | 0.05291300  |
| N | 0.20534900  | -0.18876400 | -0.90719300 |
| C | 1.26517500  | 0.07705100  | -0.02820000 |
| H | -0.78051900 | 0.94632000  | -0.69489000 |
| C | -1.75909800 | 1.44777700  | -0.09493100 |

|   |             |             |             |
|---|-------------|-------------|-------------|
| H | -2.16619100 | 2.28256600  | -0.66303000 |
| H | -1.26940300 | 1.75471700  | 0.83089200  |
| C | -2.52375500 | 0.25001400  | -0.04615000 |
| H | -3.31251700 | 0.10836400  | -0.78535000 |
| C | -2.01093000 | -0.88256900 | 0.59390100  |
| H | -2.59904500 | -1.79739900 | 0.59045300  |
| H | -1.41735600 | -0.73161900 | 1.49138400  |
| F | 0.88862800  | 0.18596800  | 1.29457000  |
| F | 2.21778300  | -0.88724500 | -0.05040000 |
| F | 1.85465400  | 1.24213600  | -0.34445100 |

### Pro-CF<sub>3</sub>

E(RB+HF-LYP) = -549.614079897 a.u.

Sum of electronic and thermal Free Energies = -549.517503 a.u.

|   |             |             |             |
|---|-------------|-------------|-------------|
| C | 0.51437700  | 1.41624800  | -0.36575500 |
| H | 0.93341300  | 1.94494300  | -1.22896600 |
| H | -0.11327100 | 2.13227300  | 0.17045800  |
| N | -0.36324200 | 0.36509500  | -0.89220000 |
| C | -1.34123500 | -0.15734700 | -0.04236300 |
| H | 0.16085800  | -0.39289100 | -1.32010900 |
| C | 2.54152200  | -1.37331400 | -0.00183700 |
| H | 3.20182200  | -2.03166600 | -0.55903800 |
| H | 1.86137200  | -1.84267600 | 0.70511800  |
| C | 2.56912400  | -0.04784500 | -0.16175700 |
| H | 3.26132300  | 0.38549200  | -0.88548900 |
| C | 1.65783900  | 0.91655000  | 0.54947400  |
| H | 2.22619800  | 1.79366600  | 0.88565000  |
| H | 1.22699300  | 0.44416700  | 1.43648000  |
| F | -0.86422200 | -0.79569600 | 1.08033100  |
| F | -2.15635900 | 0.81358400  | 0.41465400  |
| F | -2.07561600 | -1.07507800 | -0.69779300 |

### Imine-CH<sub>3</sub>

E(RB+HF-LYP) = -133.945975551 a.u.

Sum of electronic and thermal Free Energies = -133.902388 a.u.

|   |             |             |             |
|---|-------------|-------------|-------------|
| C | 1.18206100  | 0.18277800  | -0.00001200 |
| H | 2.16310500  | -0.29664100 | 0.00015800  |
| H | 1.16866600  | 1.28448400  | -0.00007100 |
| N | 0.13962000  | -0.53719200 | -0.00003500 |
| C | -1.14749700 | 0.13522400  | -0.00001900 |
| H | -1.71662000 | -0.18473800 | 0.88018000  |
| H | -1.08214800 | 1.23573200  | -0.00102200 |
| H | -1.71773000 | -0.18650100 | -0.87881300 |

### TS-CH<sub>3</sub>

E(RB+HF-LYP) = -251.812094164 a.u.

Sum of electronic and thermal Free Energies = -251.695116 a.u.

|   |            |             |             |
|---|------------|-------------|-------------|
| C | 0.56986900 | -1.16697700 | -0.48693300 |
|---|------------|-------------|-------------|

|   |             |             |             |
|---|-------------|-------------|-------------|
| H | 0.10553200  | -1.61396900 | -1.36232500 |
| H | 0.95758200  | -1.86758700 | 0.25402100  |
| N | 1.11652300  | 0.03876900  | -0.62490100 |
| C | 2.03670800  | 0.44524400  | 0.44048000  |
| H | 2.05100200  | 1.53681500  | 0.51386200  |
| H | 1.77773500  | 0.03900800  | 1.43140800  |
| H | 3.05272400  | 0.11522800  | 0.19647600  |
| H | 0.11721400  | 0.88900600  | -0.60487300 |
| C | -1.05182100 | 1.39502100  | -0.07303400 |
| H | -1.42900100 | 2.20219200  | -0.69879900 |
| H | -0.66454700 | 1.73910600  | 0.88834100  |
| C | -1.73581900 | 0.15627100  | -0.09334300 |
| H | -2.40991700 | -0.03864900 | -0.92850900 |
| C | -1.28874100 | -0.93136100 | 0.63877300  |
| H | -1.77748100 | -1.89716400 | 0.54485800  |
| H | -0.77767900 | -0.76456100 | 1.58418200  |

### Pro-CH<sub>3</sub>

E(RB+HF-LYP) = -251.881736493 a.u.

Sum of electronic and thermal Free Energies = -251.758803 a.u.

|   |             |             |             |
|---|-------------|-------------|-------------|
| C | -0.68373700 | 1.10397800  | -0.18529500 |
| H | -0.43531600 | 1.74890600  | -1.03891900 |
| H | -1.39700800 | 1.66554600  | 0.43116400  |
| N | -1.36782900 | -0.07711400 | -0.69801100 |
| C | -2.00095400 | -0.91152600 | 0.31673300  |
| H | -2.49885000 | -1.75573400 | -0.17092800 |
| H | -1.32655000 | -1.32298000 | 1.08862900  |
| H | -2.77306000 | -0.32891700 | 0.83297300  |
| H | -0.70929300 | -0.63596100 | -1.23546600 |
| C | 2.14815300  | -1.02911100 | -0.02907000 |
| H | 2.92040000  | -1.44086400 | -0.67255900 |
| H | 1.77549200  | -1.67813000 | 0.76047800  |
| C | 1.69137000  | 0.21537600  | -0.18382600 |
| H | 2.09878900  | 0.82824800  | -0.99038800 |
| C | 0.60824800  | 0.85516300  | 0.63912700  |
| H | 0.95772100  | 1.82436300  | 1.02238400  |
| H | 0.38399300  | 0.23204400  | 1.51268700  |

### Imine-Ph

E(RB+HF-LYP) = -325.687864991 a.u.

Sum of electronic and thermal Free Energies = -325.596789 a.u.

|   |             |             |             |
|---|-------------|-------------|-------------|
| C | 2.78681400  | 0.23438800  | 0.30358900  |
| H | 3.84690400  | 0.02901800  | 0.14863200  |
| H | 2.53170700  | 1.05710500  | 0.98560300  |
| N | 1.92636000  | -0.48559500 | -0.29617300 |
| C | 0.55006900  | -0.20288000 | -0.14716100 |
| C | -0.33014800 | -1.28985700 | -0.03201100 |

|   |             |             |             |   |             |             |             |
|---|-------------|-------------|-------------|---|-------------|-------------|-------------|
| C | 0.03159900  | 1.10226400  | -0.16168400 | H | 4.26203600  | 2.08182200  | 0.80126900  |
| C | -1.69776500 | -1.07265300 | 0.11515700  | H | 3.94588400  | 1.55203900  | -0.94314400 |
| H | 0.08165600  | -2.29393200 | -0.04878200 | C | 3.38360200  | 0.16929800  | 0.55881300  |
| C | -1.34179800 | 1.31139900  | -0.03635100 | H | 3.34326400  | -0.01674500 | 1.63346100  |
| H | 0.70274200  | 1.94376100  | -0.30625200 | C | 2.83208600  | -0.92408700 | -0.31672800 |
| C | -2.20977700 | 0.22822100  | 0.11281700  | H | 3.37665000  | -1.85873200 | -0.12859600 |
| H | -2.36854300 | -1.92075400 | 0.21942600  | H | 2.97694200  | -0.66813500 | -1.37247000 |
| H | -1.73442100 | 2.32414100  | -0.06140400 | C | -0.82003800 | 0.03818800  | -0.16399700 |
| H | -3.27854100 | 0.39453300  | 0.20984600  | C | -1.59406700 | -1.11803800 | 0.04867700  |

### TS - Ph

E(RB+HF-LYP) = -443.555926865 a.u.

Sum of electronic and thermal Free Energies = -443.390367 a.u.

|   |             |             |             |   |             |             |             |
|---|-------------|-------------|-------------|---|-------------|-------------|-------------|
| C | -1.49071000 | -1.30577400 | -0.58331800 | C | -2.85477400 | 1.36832600  | -0.02325000 |
| H | -2.27186800 | -1.62605400 | -1.27027500 | H | -0.89386000 | 2.18808500  | -0.35982300 |
| H | -1.05815000 | -2.11215000 | 0.00973000  | C | -3.62074800 | 0.21580800  | 0.18119500  |
| N | -0.71557600 | -0.28759800 | -0.99723700 | H | -3.55249800 | -1.92799400 | 0.37513000  |
| H | -1.48342500 | 0.86611200  | -0.66990900 | H | -3.33474300 | 2.34312500  | -0.04972100 |
| C | -2.26594500 | 1.54454400  | 0.11685200  | H | -4.69598800 | 0.28344800  | 0.31372700  |
| H | -2.66635400 | 2.41982300  | -0.39297700 |   |             |             |             |
| H | -1.54120900 | 1.79617300  | 0.89498900  |   |             |             |             |
| C | -3.15397400 | 0.47156200  | 0.38631600  |   |             |             |             |
| H | -4.09757200 | 0.42965700  | -0.15805600 |   |             |             |             |
| C | -2.67097000 | -0.70753500 | 0.95072200  |   |             |             |             |
| H | -3.34606100 | -1.54667100 | 1.10021500  |   |             |             |             |
| H | -1.86907900 | -0.63941800 | 1.68315900  |   |             |             |             |
| C | 0.58385600  | -0.14427700 | -0.46517100 |   |             |             |             |
| C | 1.39090500  | -1.23786800 | -0.09335400 |   |             |             |             |
| C | 1.14439900  | 1.14629000  | -0.38250300 |   |             |             |             |
| C | 2.69206600  | -1.04002100 | 0.36833100  |   |             |             |             |
| H | 1.01618700  | -2.25035300 | -0.20480800 |   |             |             |             |
| C | 2.44301600  | 1.33539400  | 0.08073700  |   |             |             |             |
| H | 0.54779700  | 1.99884700  | -0.69176200 |   |             |             |             |
| C | 3.22675500  | 0.24481600  | 0.46731000  |   |             |             |             |
| H | 3.29480900  | -1.90225500 | 0.64138100  |   |             |             |             |
| H | 2.84669300  | 2.34276600  | 0.13804200  |   |             |             |             |
| H | 4.24087000  | 0.39391900  | 0.82540300  |   |             |             |             |

### Pro - Ph

E(RB+HF-LYP) = -443.630554898 a.u.

Sum of electronic and thermal Free Energies = -443.460022 a.u.

|   |            |             |             |
|---|------------|-------------|-------------|
| C | 1.33880200 | -1.19186600 | -0.06137200 |
| H | 1.19563200 | -1.52062900 | 0.98383700  |
| H | 1.01611200 | -2.02367200 | -0.69944500 |
| N | 0.55463100 | -0.01258000 | -0.37606100 |
| H | 1.03818100 | 0.85427200  | -0.17681200 |
| C | 3.88341300 | 1.32625800  | 0.11910400  |
